# Supplementary material
Source: PubMed Central journal article supplement (PMC8503995)
Supplement: 13756_2021_993_MOESM1_ESM.pdf [file 13756_2021_993_MOESM1_ESM.pdf]

(N95 OR FFP2 OR KN95) AND (decontamination OR disinfection OR sterilization) AND (reuse OR reprocessing OR reusing) AND (coronavirus OR "COVID 19" OR "SARS CoV-2" OR stearothermophilus OR influenza)
